# Supplementary material
Source: publisher figshare collection journal article supplement (https://springernature.figshare.com/ndownloader/files/7082684)
Supplement: Supplementary file 1 [file 7082684]

Supplementary Figure 1

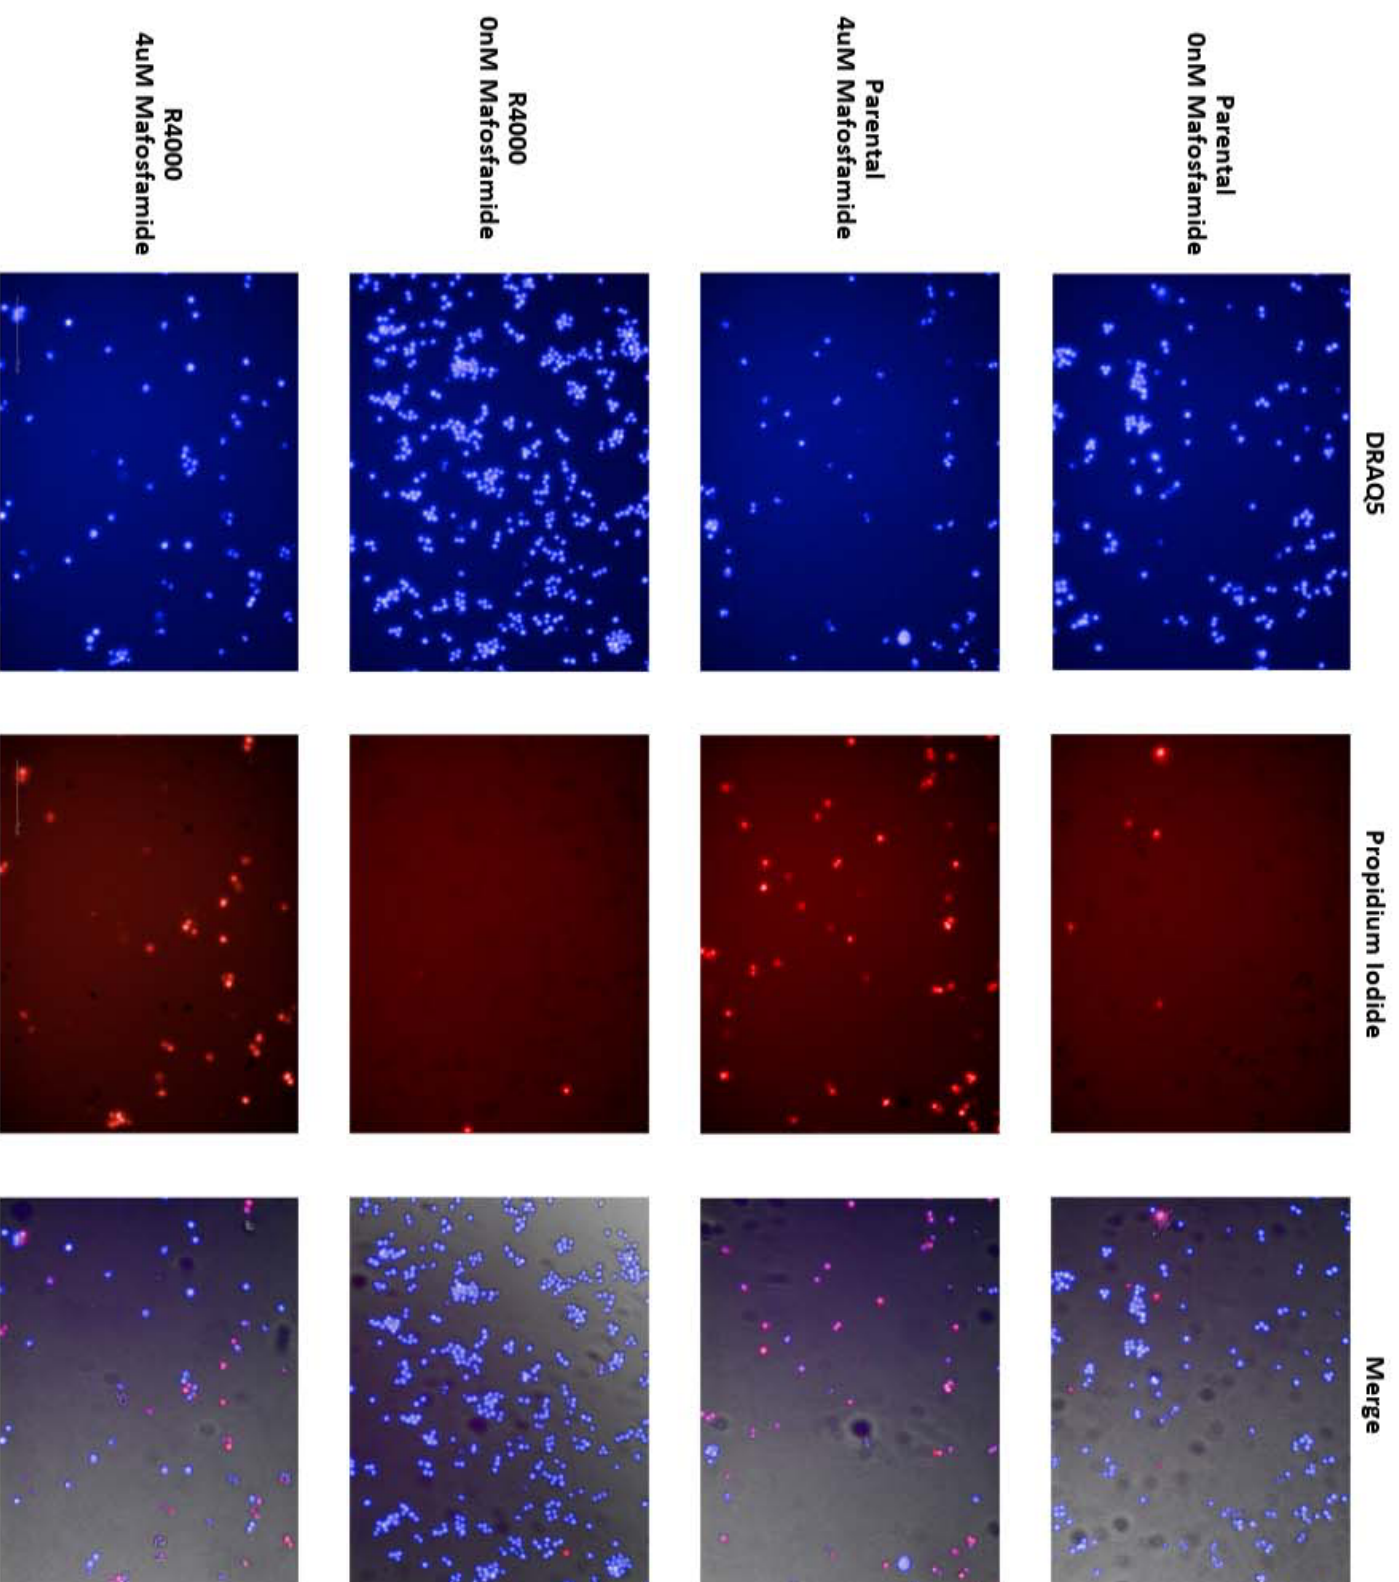

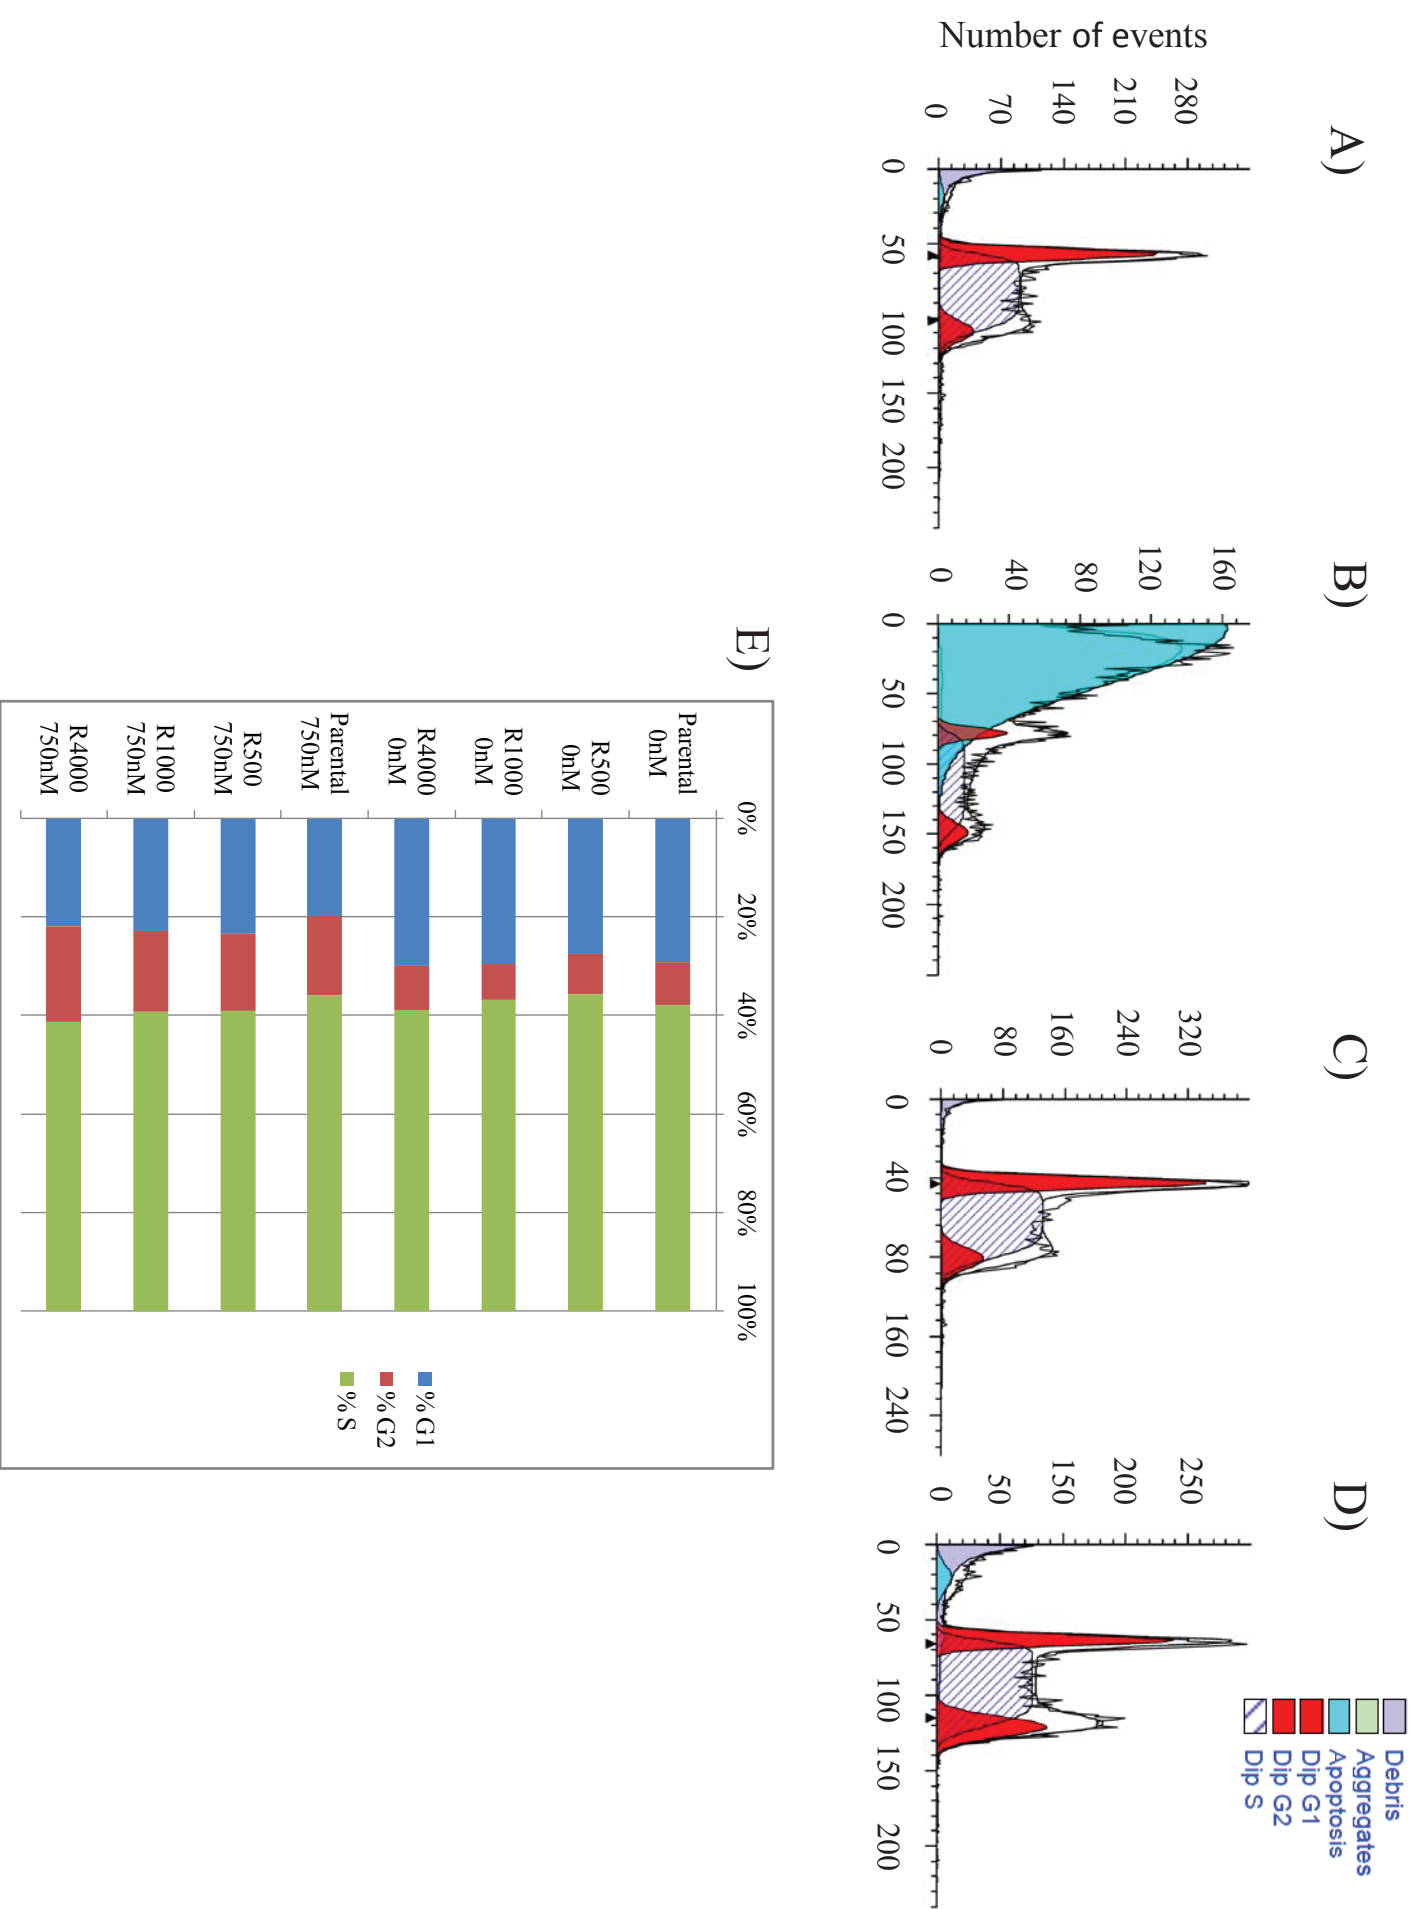

Supplementary Figure 3

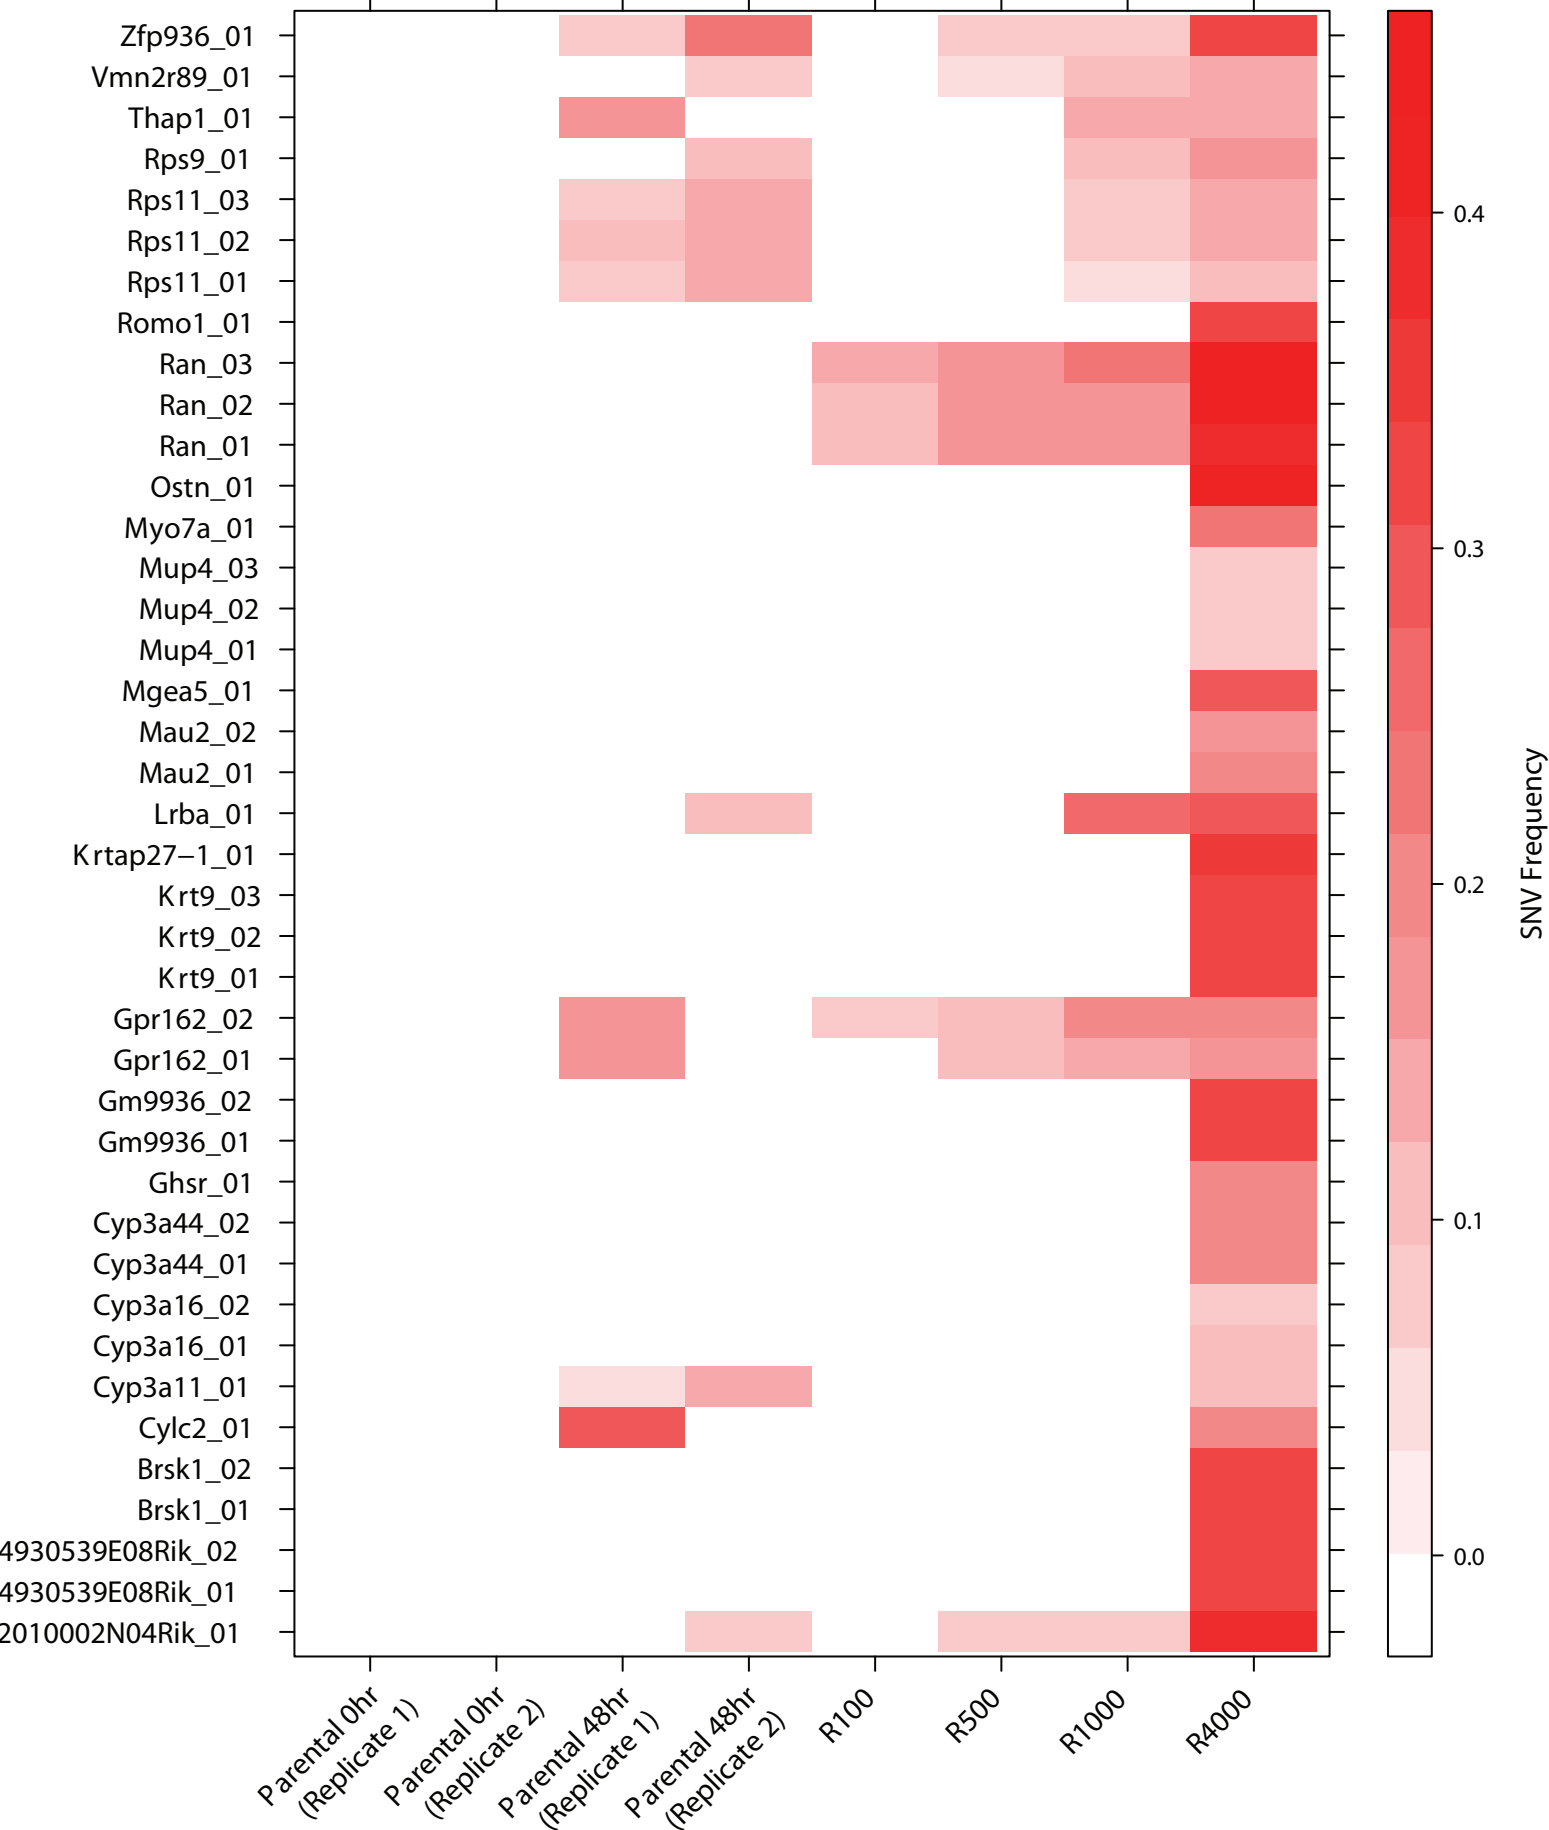

Supplementary Figure 4A

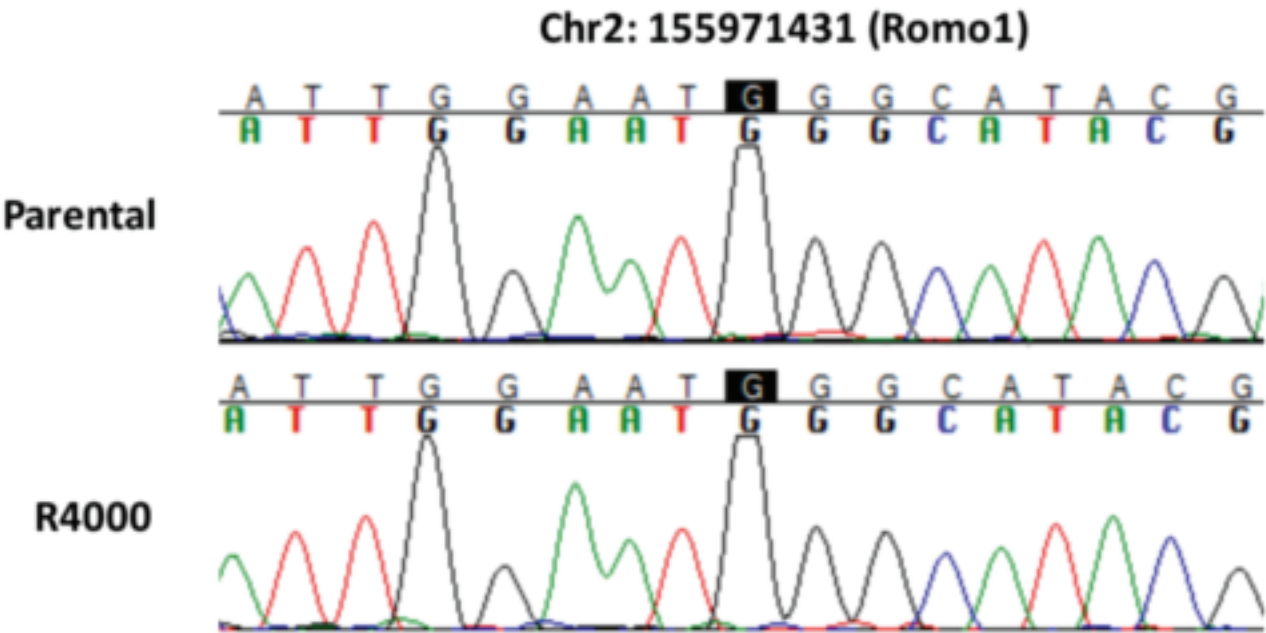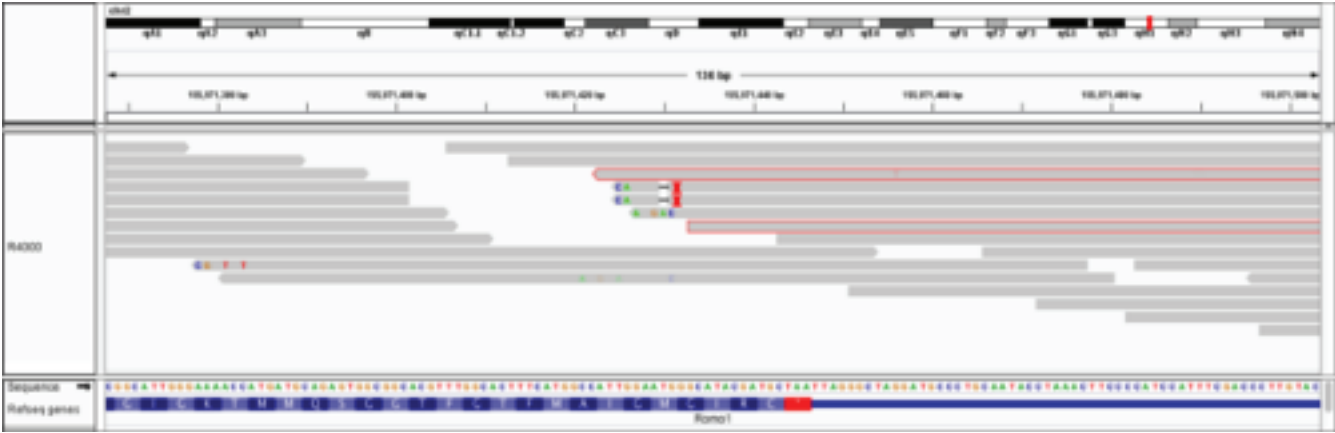

Supplementary Figure 4B

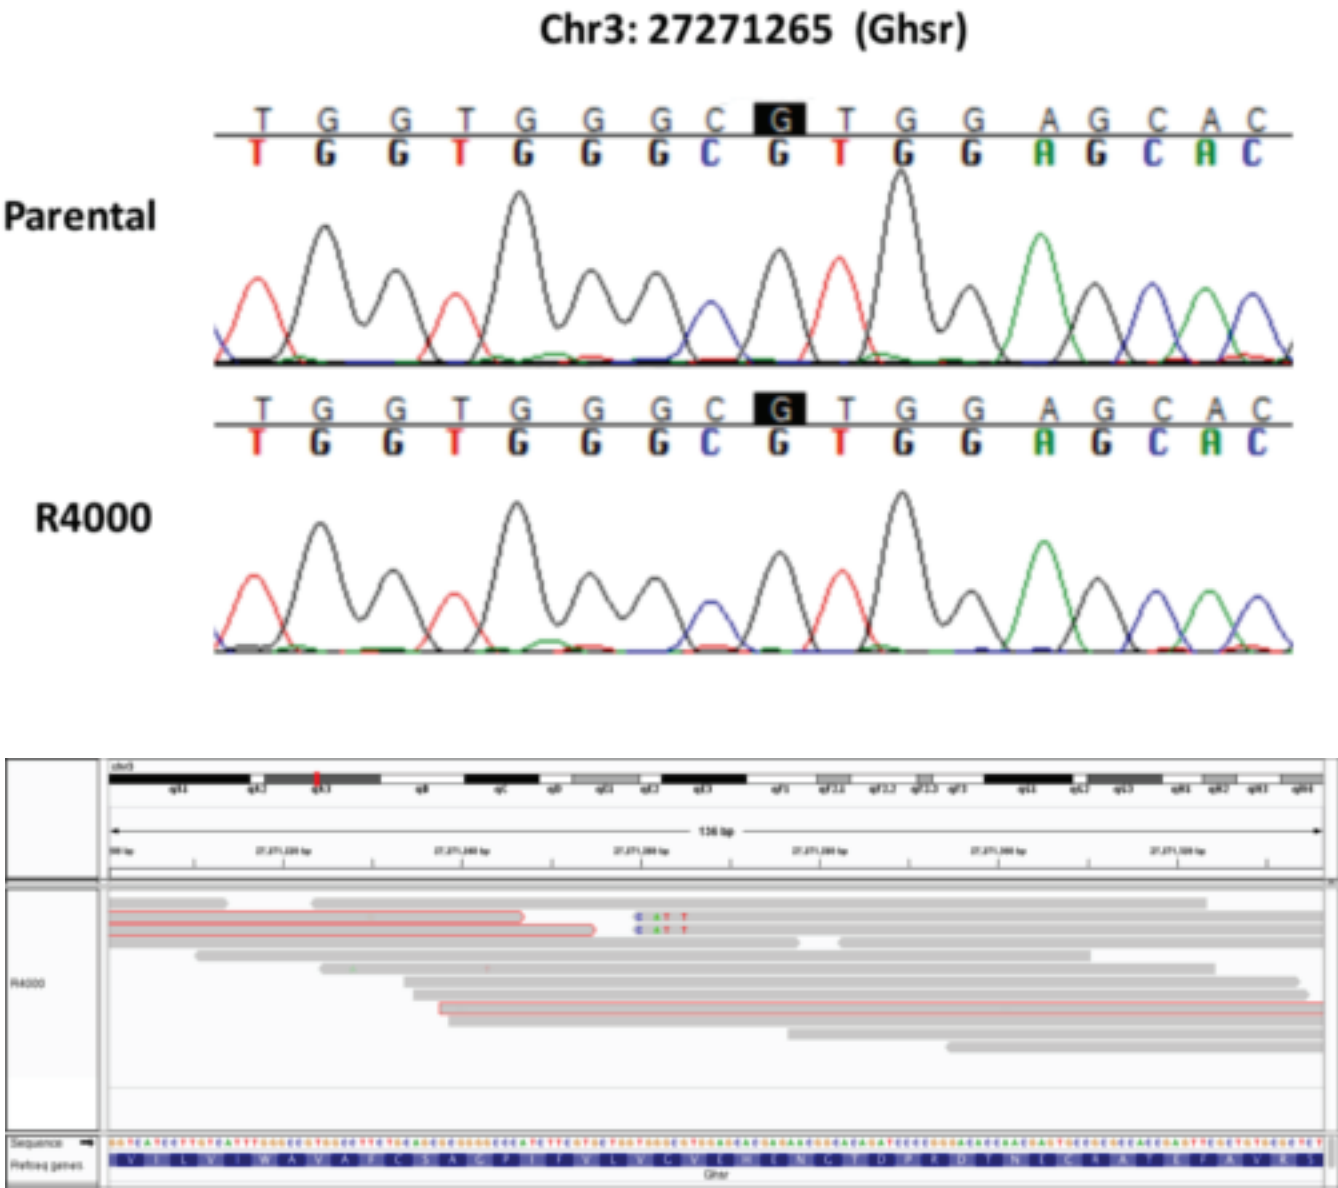

Supplementary Figure 4C

Chr5: 110557905 (Zfp605)

Parental

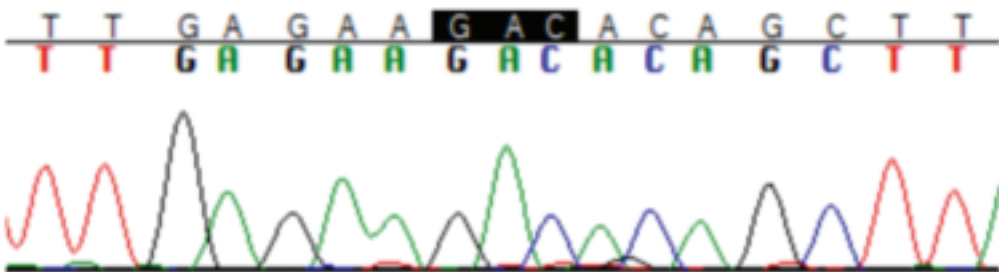

R4000

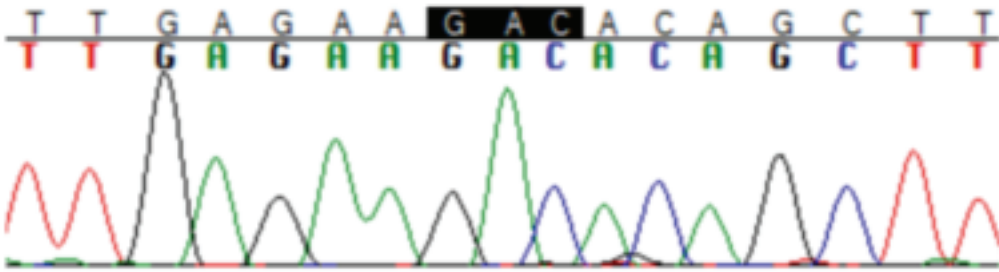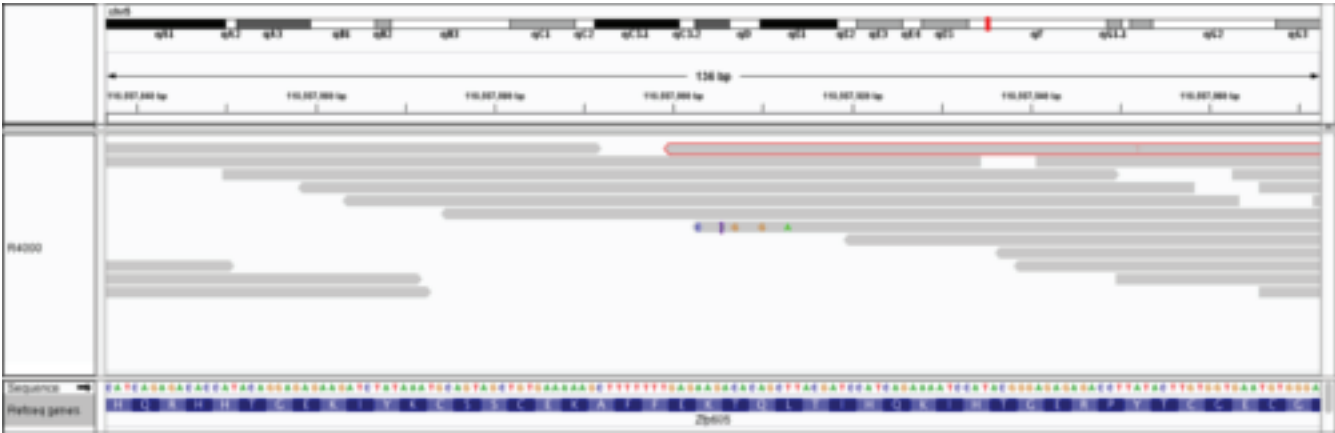

Supplementary Figure 4D

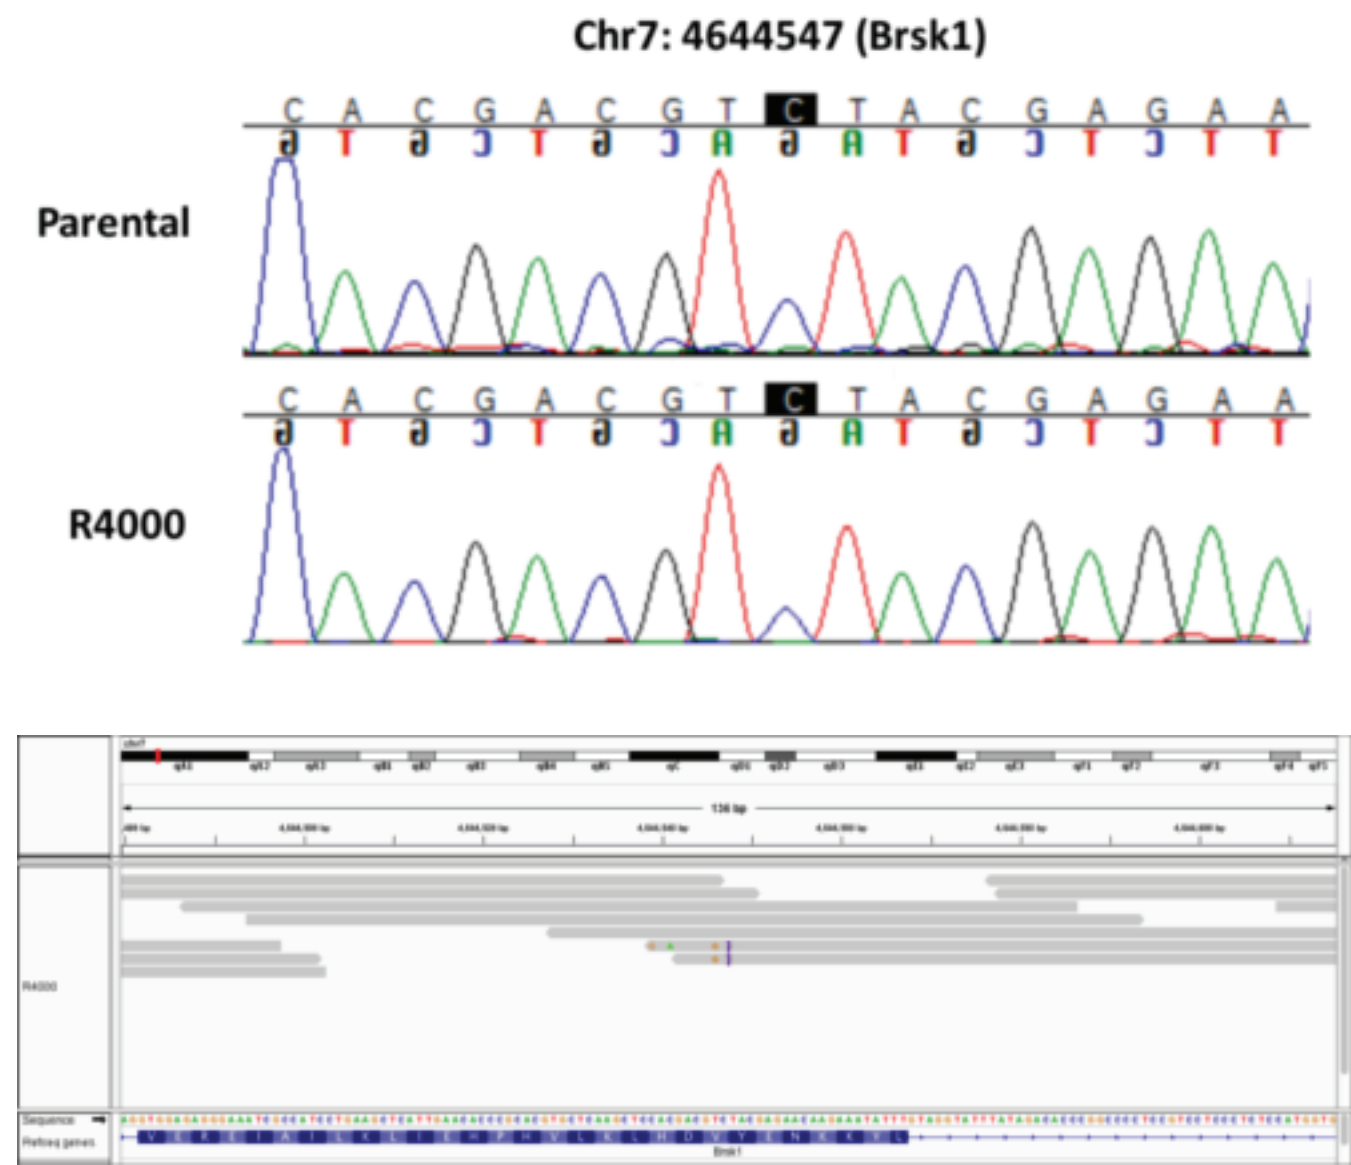

Supplementary Figure 4E

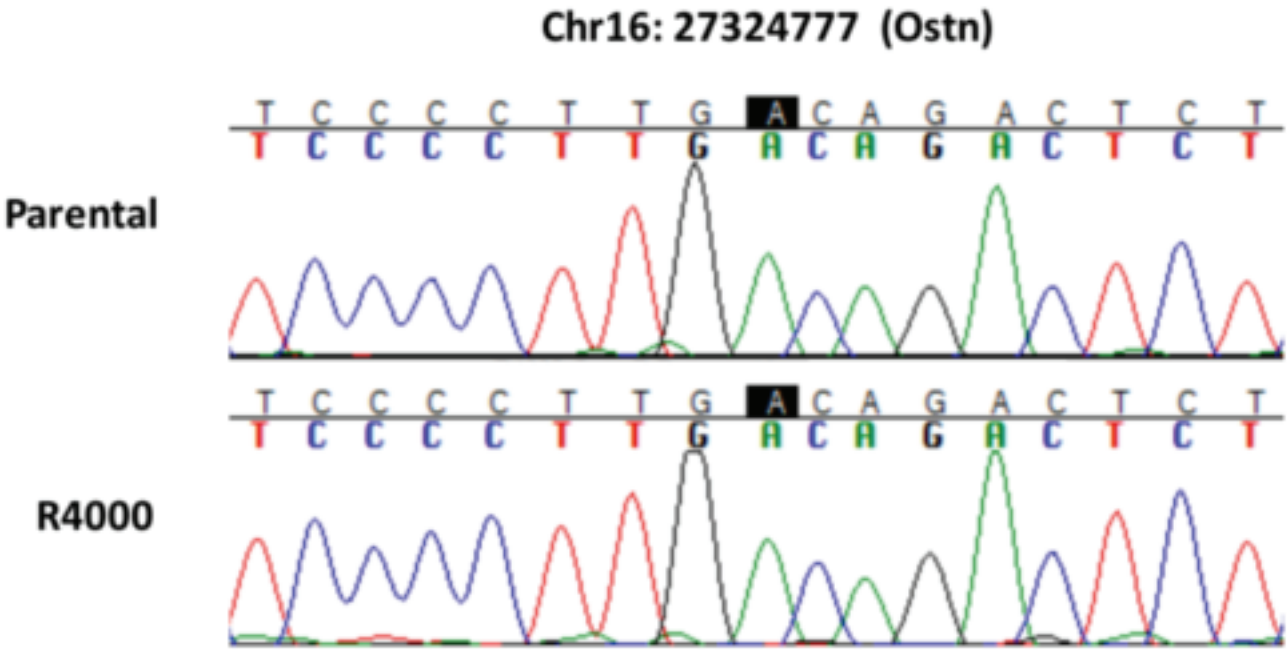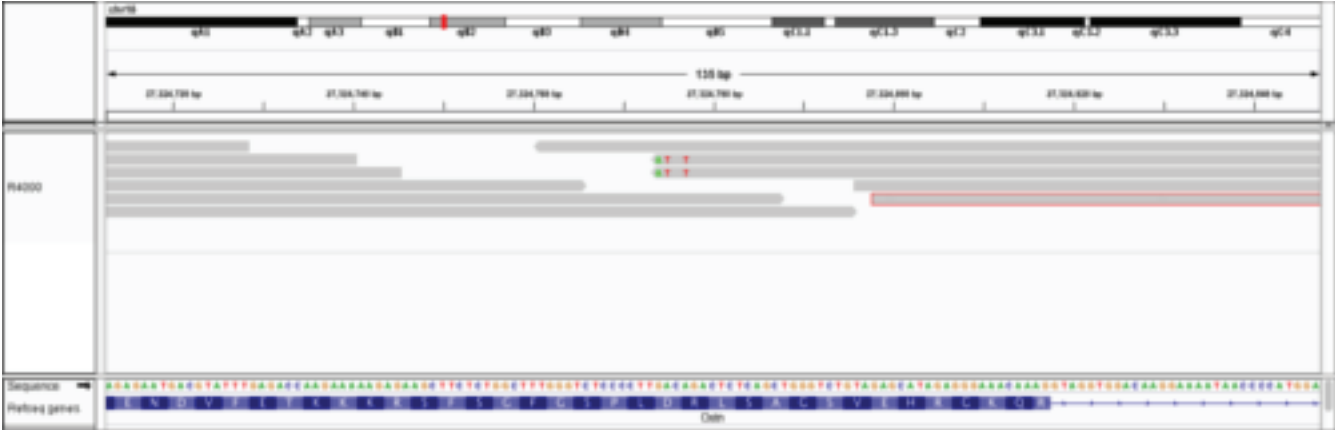

Supplementary Figure 5

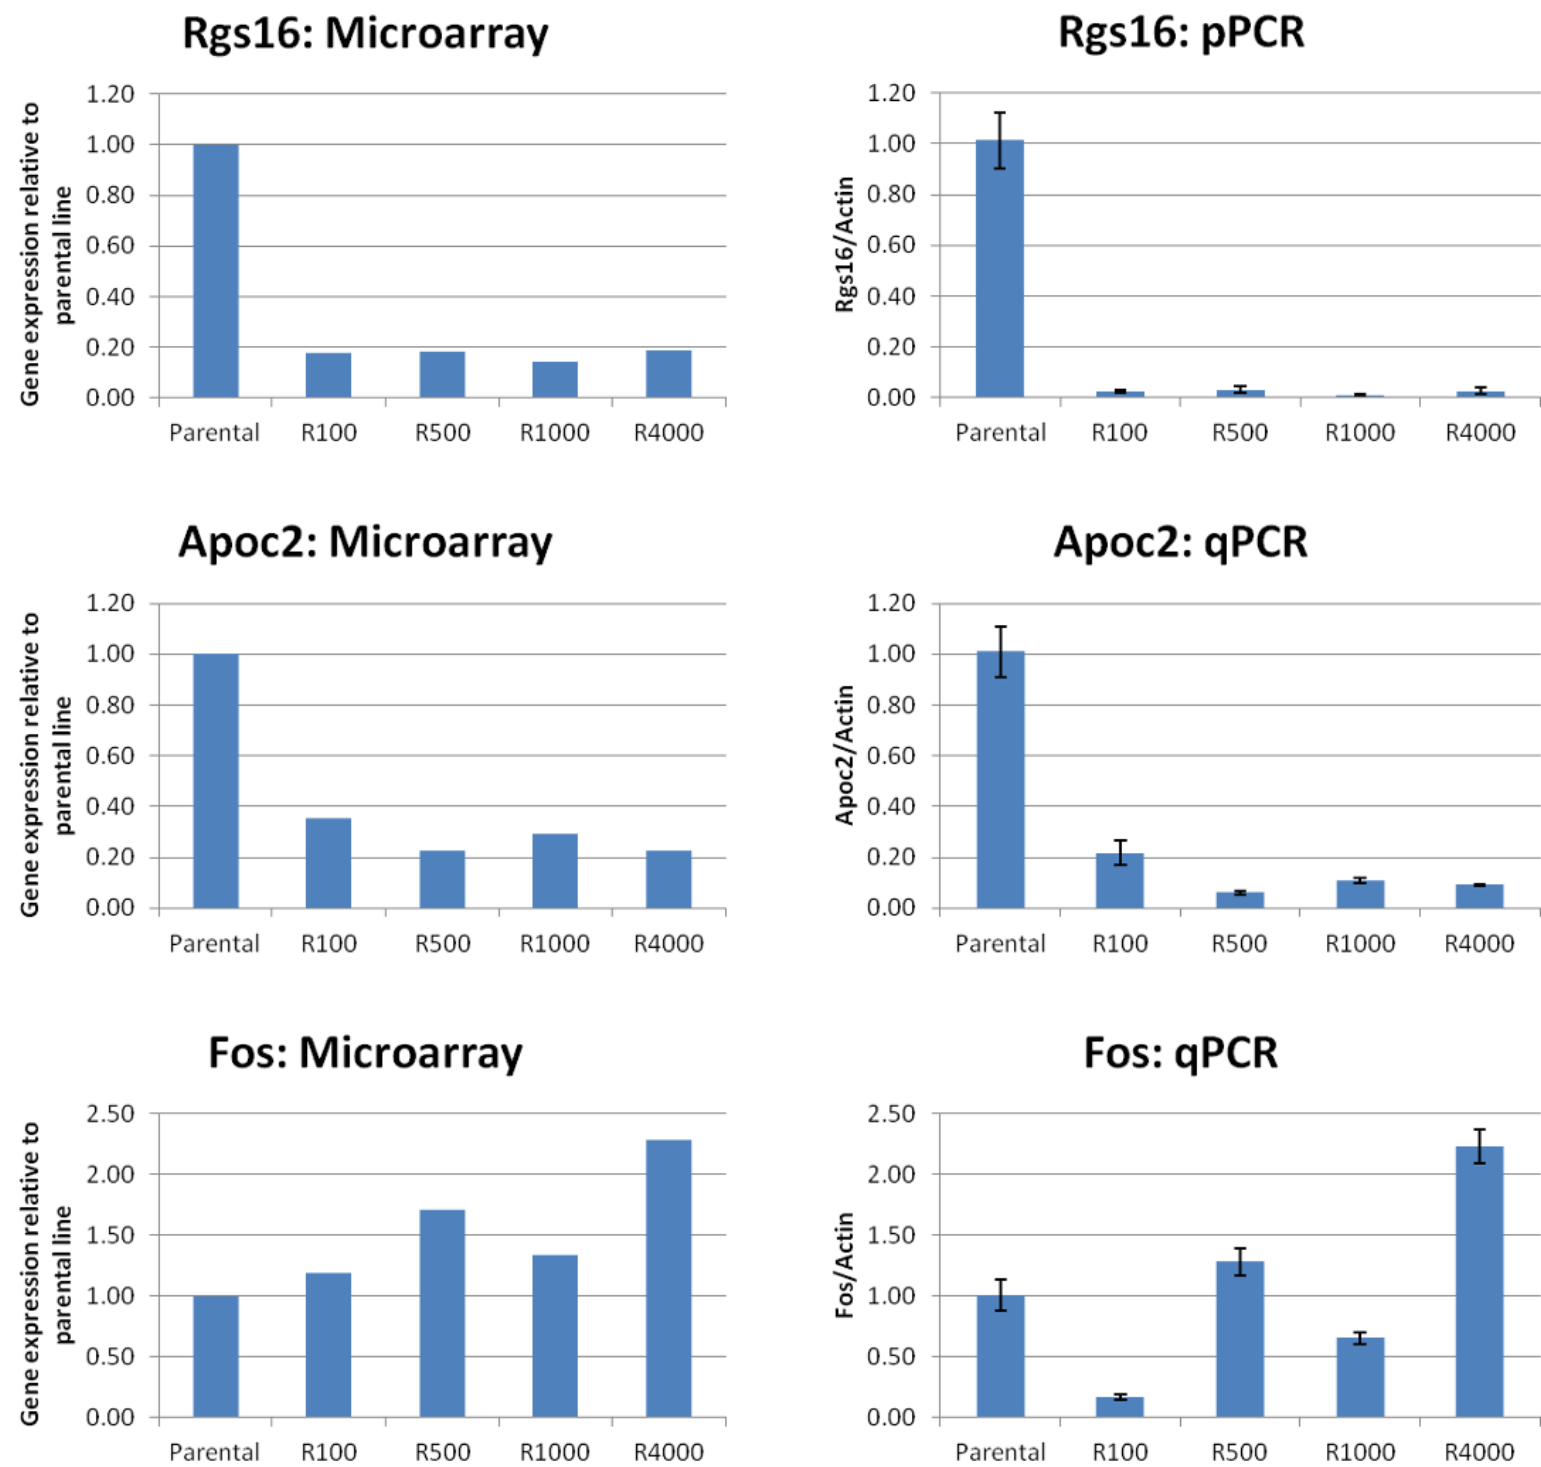

Supplementary Figure 6

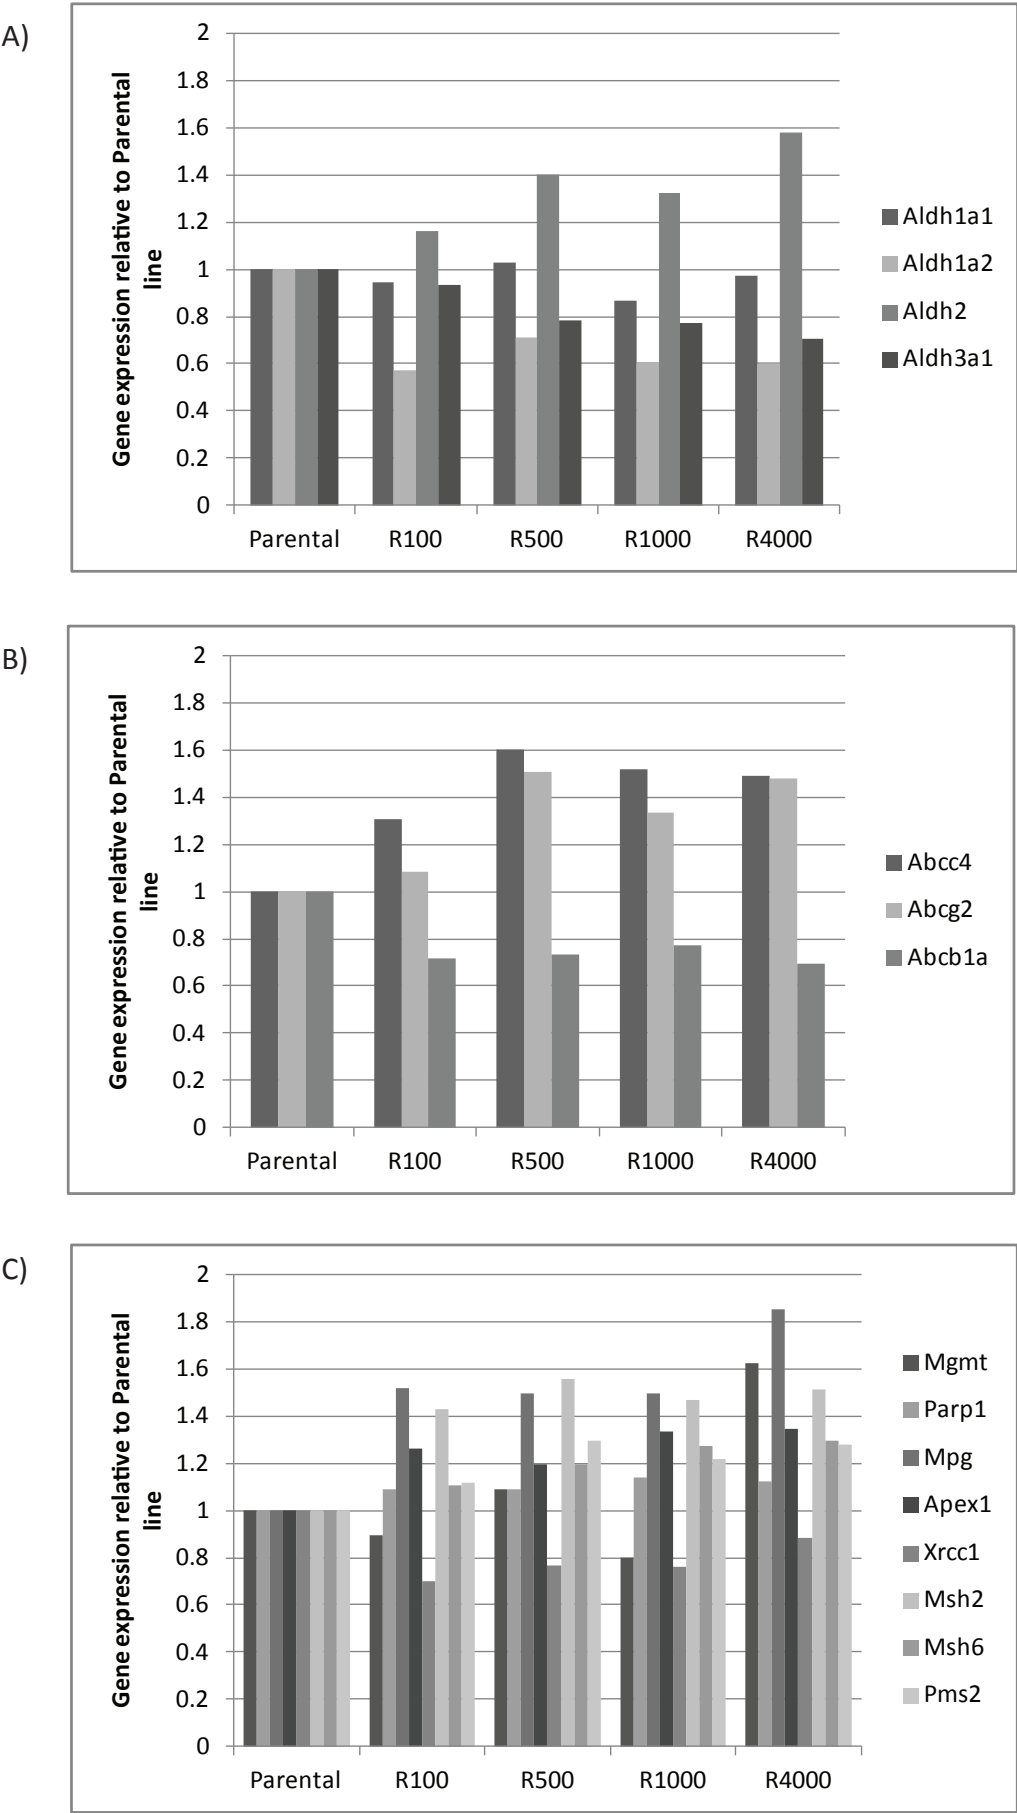

Supplementary Figure 7

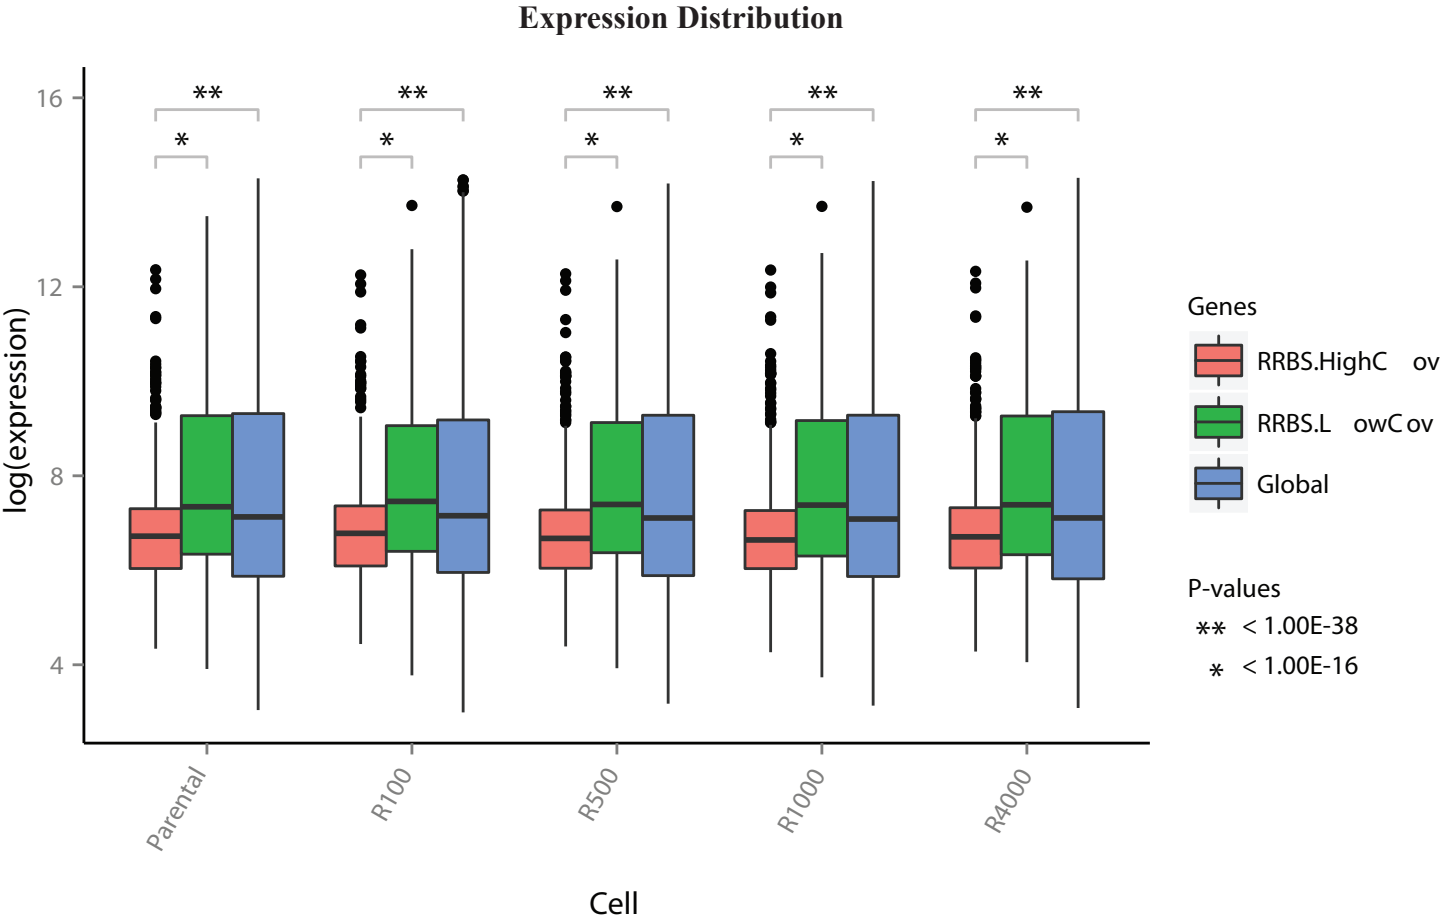

Supplementary Figure 8

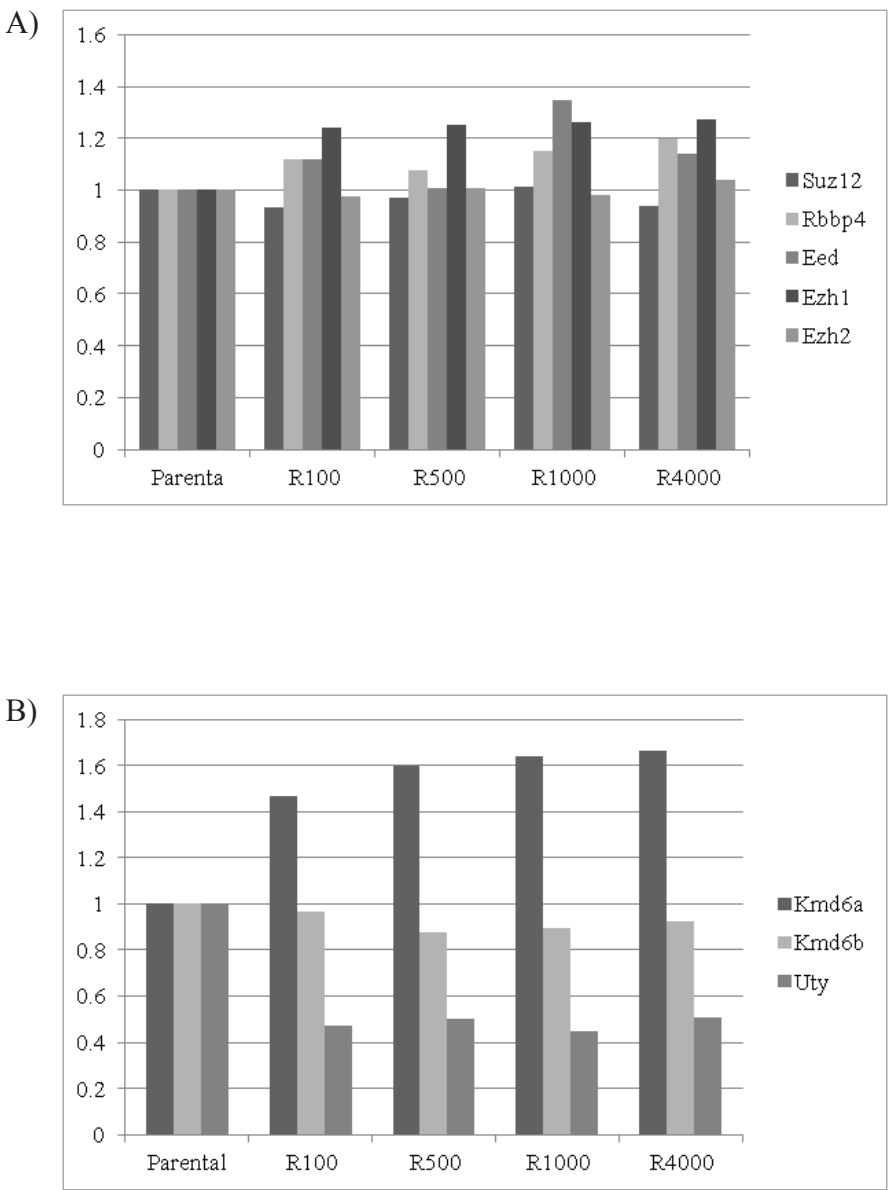

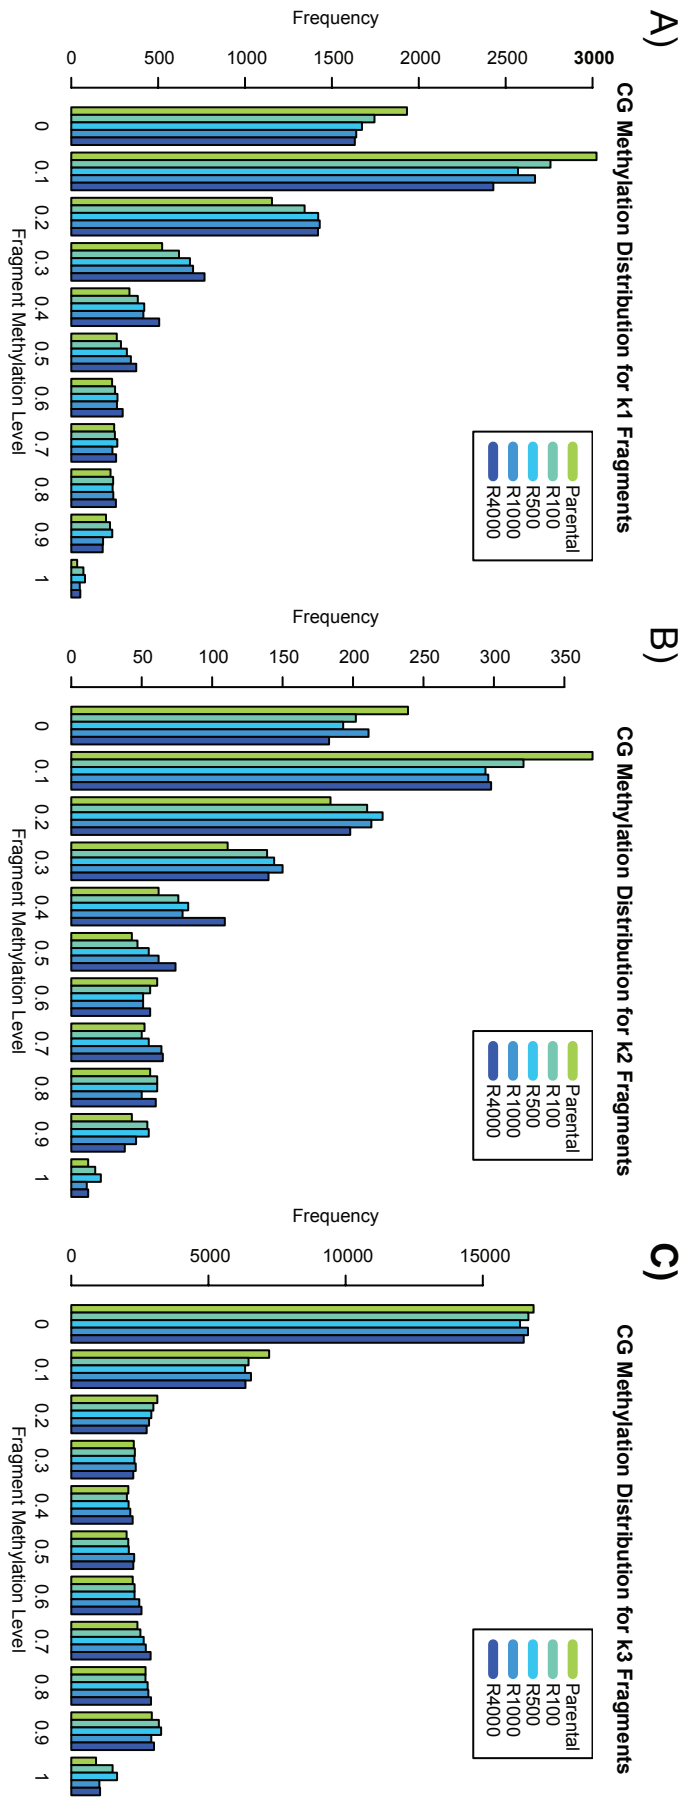

Supplementary Figure 10

A)

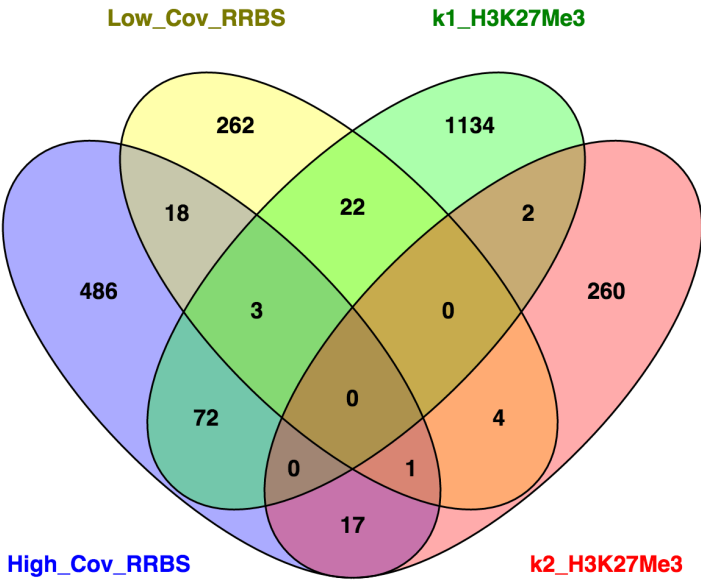

B)

| Comparison     | # RRBS Genes | # H3K27Me3 | # Intersect | p-value  |
|----------------|--------------|------------|-------------|----------|
| High Cov. & k1 | 597          | 1477       | 75          | 0.00E+00 |
| High Cov. & k2 | 597          | 360        | 18          | 5.99E-05 |
| Low Cov. & k1  | 310          | 1477       | 25          | 1.75E-03 |
| Low Cov. & k2  | 310          | 360        | 5           | 2.19E-01 |

Supplementary Figure 11

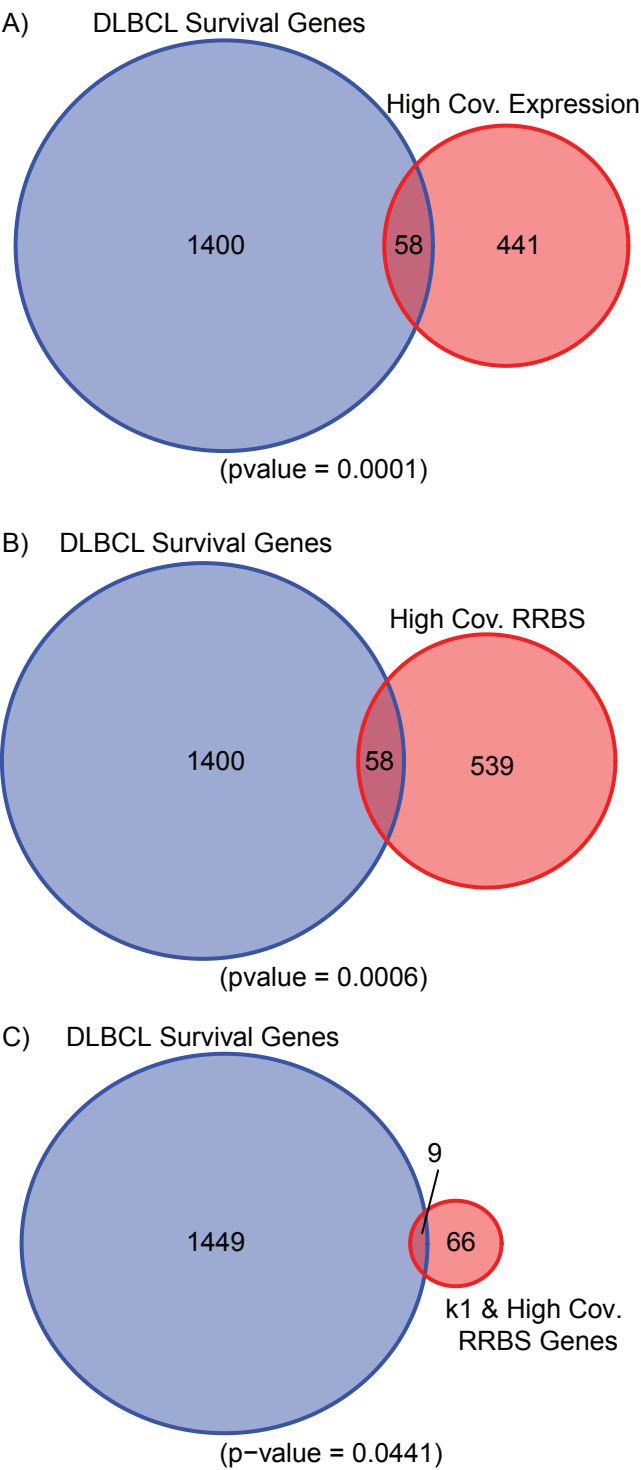

Supplementary Table 1

| Cell Line       | Treatment | Non-Apoptotic |       |       | % Apoptotic |
|-----------------|-----------|---------------|-------|-------|-------------|
|                 |           | % G1          | % G2  | % S   |             |
| Eu-Myc Parental | 0nM       | 29.22         | 8.86  | 61.92 | 1.36        |
| Eu-Myc Parental | 750nM     | 21.63         | 17.57 | 69.79 | 81.47       |
| Eu-Myc R500     | 0nM       | 27.49         | 8.25  | 64.26 | 0.78        |
| Eu-Myc R500     | 750nM     | 23.39         | 15.72 | 60.89 | 46.5        |
| Eu-Myc R1000    | 0nM       | 29.62         | 7.2   | 63.18 | 1.03        |
| Eu-Myc R1000    | 750nM     | 22.83         | 16.55 | 60.55 | 36.3        |
| Eu-Myc R4000    | 0nM       | 29.93         | 9     | 61.07 | 0.1         |
| Eu-Myc R4000    | 750nM     | 22.06         | 19.27 | 58.67 | 3.26        |

Supplementary Table S2

| Comment                                                                               | Chromosome | Position  | Reference | Alternate  | Impact   | Type                    | Genes                 |
|---------------------------------------------------------------------------------------|------------|-----------|-----------|------------|----------|-------------------------|-----------------------|
| All ends of reads, likely sequencing artifact                                         | chr2       | 155971431 | G         | GCAGGAAGAC | High     | Frame shift             | Rbm39, Romo1, Nfs1    |
| All ends of reads, likely sequencing artifact                                         | chr3       | 27271265  | G         | GATCT      | High     | Frame shift             | Ghsr                  |
| MMSAT4 satellite repeat                                                               | chr5       | 110557905 | GAC       | G          | High     | Frame shift             | Zfp605                |
|                                                                                       |            |           |           |            |          | Non-synonymous (coding) |                       |
| MMSAT4 satellite repeat                                                               | chr5       | 110557910 | A         | G          | Moderate | synonymous (coding)     | Zfp605                |
|                                                                                       |            |           |           |            |          | Non-synonymous (coding) |                       |
| End of read for one of two alternate reads                                            | chr5       | 115307559 | C         | A          | Moderate | synonymous (coding)     | 4930519G04Rik, Gm9936 |
|                                                                                       |            |           |           |            |          | Non-synonymous (coding) |                       |
| End of read for one of two alternate reads                                            | chr5       | 115307560 | C         | T          | Moderate | synonymous (coding)     | 4930519G04Rik, Gm9936 |
|                                                                                       |            |           |           |            |          | Non-synonymous (coding) |                       |
| Alternate reads for parental line are found at a different copy of this repeat region | chr5       | 129526821 | G         | A          | Moderate | synonymous (coding)     | Ran                   |
|                                                                                       |            |           |           |            |          | Non-synonymous (coding) |                       |
| Alternate reads for parental line are found at a different copy of this repeat region | chr5       | 129526836 | G         | A          | Moderate | synonymous (coding)     | Ran                   |
|                                                                                       |            |           |           |            |          | Non-synonymous (coding) |                       |
| Alternate reads for parental line are found at a different copy of this repeat region | chr5       | 129526848 | G         | A          | Moderate | synonymous (coding)     | Ran                   |
|                                                                                       |            |           |           |            |          | Non-synonymous (coding) |                       |
| Misalignment                                                                          | chr7       | 3656339   | A         | G          | Low      | Synonymous (coding)     | Tsen34, Rps9          |
|                                                                                       |            |           |           |            |          | Non-synonymous (coding) |                       |
| Misalignment                                                                          | chr7       | 3656351   | T         | G          | Moderate | synonymous (coding)     | Tsen34, Rps9          |
|                                                                                       |            |           |           |            |          | Synonymous (coding)     |                       |
| Misalignment                                                                          | chr7       | 3656354   | C         | T          | Low      | synonymous (coding)     | Tsen34, Rps9          |
|                                                                                       |            |           |           |            |          | Non-synonymous (coding) |                       |
| All ends of reads, likely sequencing artifact                                         | chr7       | 4644546   | T         | G          | Moderate | synonymous (coding)     | Brsk1                 |
| All ends of reads, likely sequencing artifact                                         | chr7       | 4644547   | C         | CA         | High     | Frame shift             | Brsk1                 |

Supplementary Table S2 (continued)

|                                               |       |           |   |      |          |                         |           |
|-----------------------------------------------|-------|-----------|---|------|----------|-------------------------|-----------|
| Satellite repeat region                       | chr7  | 50444853  | A | G    | Moderate | Non-synonymous (coding) | Zfp936    |
|                                               |       |           |   |      |          | Non-synonymous (coding) |           |
| All ends of reads, likely sequencing artifact | chr7  | 105219534 | G | A    | Moderate | Synonymous (coding)     | Myo7a     |
| All ends of reads, likely sequencing artifact | chr7  | 105219535 | C | T    | Low      | Synonymous (coding)     | Myo7a     |
|                                               |       |           |   |      |          | Non-synonymous (coding) |           |
| All ends of reads, likely sequencing artifact | chr11 | 100054428 | C | T    | Moderate | Non-synonymous (coding) | Krt9      |
|                                               |       |           |   |      |          | Non-synonymous (coding) |           |
| All ends of reads, likely sequencing artifact | chr11 | 100054433 | T | C    | Moderate | Non-synonymous (coding) | Krt9      |
|                                               |       |           |   |      |          | Non-synonymous (coding) |           |
| All ends of reads, likely sequencing artifact | chr11 | 100054435 | C | T    | Moderate | Non-synonymous (coding) | Krt9      |
|                                               |       |           |   |      |          | Stop gained             | Ostn      |
| All ends of reads, likely sequencing artifact | chr16 | 27324777  | A | ATCT | High     | Synonymous (coding)     |           |
| Mucin tandem repeats                          | chr16 | 32755664  | T | C    | Low      | Non-synonymous (coding) | Muc4      |
|                                               |       |           |   |      |          | Non-synonymous (coding) |           |
| OK                                            | chr16 | 88671883  | C | T    | Moderate | Non-synonymous (coding) | Krtap27-1 |

Supplementary Table 3

| Ontology              | High Cov. Term Name                                | Hyper<br>FDR Q-Val | Hyper<br>Foreground<br>Gene Hits | Total<br>Genes<br>Annotated |
|-----------------------|----------------------------------------------------|--------------------|----------------------------------|-----------------------------|
| GO Molecular Function | sequence-specific DNA binding                      | 4.98E-16           | 92                               | 653                         |
| GO Molecular Function | nucleic acid binding transcription factor activity | 1.79E-14           | 103                              | 830                         |
| GO Biological Process | cell differentiation                               | 3.26E-25           | 197                              | 2082                        |
| GO Biological Process | anatomical structure morphogenesis                 | 5.08E-23           | 167                              | 1478                        |
| GO Biological Process | nervous system development                         | 7.60E-21           | 148                              | 1338                        |
| GO Cellular Component | transcription factor complex                       | 1.42E-04           | 34                               | 300                         |
| GO Cellular Component | tight junction                                     | 7.12E-03           | 13                               | 96                          |

Supplimentary Table 4

| Cell line | Correlation Coefficient |
|-----------|-------------------------|
| Parental  | 0.919                   |
| R100      | 0.952                   |
| R500      | 0.948                   |
| R1000     | 0.935                   |
| R4000     | 0.928                   |

Supplementary Table 5

| Category        | Enriched Terms (PC1 High)         | Count | List Total | Pop Hits | Pop Total | FDR      |
|-----------------|-----------------------------------|-------|------------|----------|-----------|----------|
| SP_PIR_KEYWORDS | Secreted                          | 101   | 655        | 1420     | 17854     | 1.79E-07 |
| INTERPRO        | Keratin, high sulphur B2 protein  | 12    | 643        | 31       | 17763     | 8.66E-06 |
| INTERPRO        | Claudin                           | 10    | 643        | 28       | 17763     | 5.81E-04 |
| GOTERM_CC_FAT   | extracellular region part         | 58    | 467        | 774      | 12504     | 7.11E-04 |
| Category        | Enriched Terms (PC1 Low)          | Count | List Total | Pop Hits | Pop Total | FDR      |
| GOTERM_CC_FAT   | mitochondrion                     | 230   | 610        | 1322     | 12504     | 2.92E-71 |
| GOTERM_CC_FAT   | mitochondrial part                | 117   | 610        | 524      | 12504     | 4.47E-43 |
| GOTERM_CC_FAT   | ribonucleoprotein complex         | 102   | 610        | 462      | 12504     | 2.04E-36 |
| GOTERM_CC_FAT   | membrane-enclosed lumen           | 167   | 610        | 1174     | 12504     | 3.45E-36 |
| GOTERM_BP_FAT   | RNA processing                    | 92    | 643        | 437      | 13588     | 1.73E-31 |
| GOTERM_BP_FAT   | ncRNA metabolic process           | 63    | 643        | 202      | 13588     | 9.43E-31 |
| GOTERM_BP_FAT   | ncRNA metabolic process           | 63    | 643        | 202      | 13588     | 9.43E-31 |
| SP_PIR_KEYWORDS | protein biosynthesis              | 42    | 860        | 139      | 17854     | 1.53E-18 |
| GOTERM_CC_FAT   | nuclear lumen                     | 112   | 610        | 883      | 12504     | 2.78E-18 |
| GOTERM_BP_FAT   | tRNA metabolic process            | 36    | 643        | 113      | 13588     | 1.45E-16 |
| SMART           | WD40                              | 34    | 273        | 259      | 9131      | 1.20E-09 |
| SP_PIR_KEYWORDS | protein transport                 | 53    | 860        | 461      | 17854     | 1.35E-05 |
| SP_PIR_KEYWORDS | translocation                     | 16    | 860        | 65       | 17854     | 4.49E-04 |
| Category        | Enriched Terms (PC2 High)         | Count | List Total | Pop Hits | Pop Total | FDR      |
| KEGG_PATHWAY    | B cell receptor signaling pathway | 20    | 252        | 80       | 5738      | 9.59E-07 |
| UP_SEQ_FEATURE  | Complementarity-determining-3     | 11    | 742        | 23       | 16021     | 4.83E-05 |
| GOTERM_MF_FAT   | SH3 domain binding                | 15    | 590        | 79       | 13288     | 1.23E-02 |
| Category        | Enriched Terms (PC2 Low)          | Count | List Total | Pop Hits | Pop Total | FDR      |
| KEGG_PATHWAY    | Ribosome                          | 21    | 270        | 89       | 5738      | 3.38E-06 |
| GOTERM_CC_FAT   | endoplasmic reticulum part        | 31    | 571        | 231      | 12504     | 2.93E-04 |
